# Supplementary material for: Association between Dupilumab and Conjunctivitis: A Systematic Review and Meta-Analysis of Randomized Controlled Trials
Source: MDPI journal article supplement (doi:10.3390/pharmaceutics15041031), 2023-03-23
Supplement: s1 [file s1]

**Table S3** Summary of authors' judgement of risk of bias of included studies.

|                     |             | D1                                                                                  | D2                                                                                  | D3                                                                                  | D4                                                                                  | D5                                                                                   | Overall                                                                               |                                                                                                   |
|---------------------|-------------|-------------------------------------------------------------------------------------|-------------------------------------------------------------------------------------|-------------------------------------------------------------------------------------|-------------------------------------------------------------------------------------|--------------------------------------------------------------------------------------|---------------------------------------------------------------------------------------|---------------------------------------------------------------------------------------------------|
| Beck 2014           | NCT01548404 |    |    |    |    |    |    |  Low risk      |
| Simpson 2016        | NCT02277743 |    |    |    |    |    |    |  Some concerns |
|                     | NCT02277769 |    |    |    |    |    |    |  High risk     |
| Thaçi 2016          | NCT01859988 |    |    |    |    |    |    |                                                                                                   |
| Blauvelt 2017       | NCT02260986 |    |    |    |    |    |    | D1 Randomization process                                                                          |
| Bruin-Weller 2018   | NCT02755649 |    |    |    |    |    |    | D2 Deviations from intended interventions                                                         |
| Blauvelt 2019       | NCT02210780 |    |    |    |    |    |    | D3 Missing outcome data                                                                           |
| Guttman-Yassky 2019 | NCT01979016 |    |    |    |    |    |    | D4 Measurement of outcomes                                                                        |
| Paller 2020         | NCT03345914 |    |    |    |    |    |    | D5 Selection of reported results                                                                  |
| Worm 2020           | NCT02395133 |    |    |    |    |    |    |                                                                                                   |
| Simpson 2020        | NCT03054428 |    |    |    |    |    |    |                                                                                                   |
| Merola 2022         | NCT04033367 |   |   |   |   |   |   |                                                                                                   |
| Paller 2022         | NCT03346434 |  |  |  |  |  |  |                                                                                                   |
| Zhao 2022           | NCT03912259 |  |  |  |  |  |  |                                                                                                   |
| Bachert 2016        | NCT01920893 |  |  |  |  |  |  |                                                                                                   |
| Wenzel 2016         | NCT01854047 |  |  |  |  |  |  |                                                                                                   |
| Castro 2018         | NCT02414854 |  |  |  |  |  |  |                                                                                                   |
| Rabe 2018           | NCT02528214 |  |  |  |  |  |  |                                                                                                   |
| Bachert 2019        | NCT02898454 |  |  |  |  |  |  |                                                                                                   |
|                     | NCT02912468 |  |  |  |  |  |  |                                                                                                   |
| Hirano 2020         | NCT02379052 |  |  |  |  |  |  |                                                                                                   |
| Bacharier 2021      | NCT02948959 |  |  |  |  |  |  |                                                                                                   |
| Dellon 2020         | NCT03633617 |  |  |  |  |  |  |                                                                                                   |
