# Supplementary material for: Association between Dupilumab and Conjunctivitis: A Systematic Review and Meta-Analysis of Randomized Controlled Trials
Source: MDPI journal article supplement (doi:10.3390/pharmaceutics15041031), 2023-03-23
Supplement: s1 [file s1]

**Table S4** Grading of recommendations assessment, development and evaluation (GRADE) evidence table for conjunctivitis in patients receiving dupilumab versus placebo.

| Certainty assessment                                                                  |              |              |                      |              |                      |                      | Event rate       |                 | Effect                 |                                             | Certainty    | Importance |
|---------------------------------------------------------------------------------------|--------------|--------------|----------------------|--------------|----------------------|----------------------|------------------|-----------------|------------------------|---------------------------------------------|--------------|------------|
| Number of studies                                                                     | Study design | Risk of bias | Inconsistency        | Indirectness | Imprecision          | Other considerations | Dupilumab        | Placebo         | Relative (95% CI)      | Absolute (95% CI)                           |              |            |
| Conjunctivitis in patients receiving dupilumab versus placebo                         |              |              |                      |              |                      |                      |                  |                 |                        |                                             |              |            |
| 23                                                                                    | RCTs         | not serious  | serious <sup>a</sup> | not serious  | serious <sup>b</sup> | none                 | 366/6040 (6.1%)  | 101/3113 (3.2%) | RR 1.89 (1.34 to 2.67) | 29 more per 1,000 (from 11 more to 54 more) | ⊕⊕○○<br>Low  | Critical   |
| Conjunctivitis in patients with AD receiving dupilumab versus placebo                 |              |              |                      |              |                      |                      |                  |                 |                        |                                             |              |            |
| 14                                                                                    | RCTs         | not serious  | not serious          | not serious  | not serious          | none                 | 319/3096 (10.3%) | 70/1627 (4.3%)  | RR 2.43 (1.89 to 3.12) | 63 more per 1,000 (from 38 more to 91 more) | ⊕⊕⊕⊕<br>High | Critical   |
| Conjunctivitis in patients with non-AD indications receiving dupilumab versus placebo |              |              |                      |              |                      |                      |                  |                 |                        |                                             |              |            |
| 9                                                                                     | RCTs         | not serious  | not serious          | not serious  | not serious          | none                 | 47/2944 (1.6%)   | 31/1486 (2.1%)  | RR 0.71 (0.44 to 1.13) | 6 fewer per 1,000 (from 12 fewer to 3 more) | ⊕⊕⊕⊕<br>High | Critical   |

Abbreviations: CI, confidence interval; RCT, randomized controlled trial; RR, risk ratio.

<sup>a</sup> I<sup>2</sup> of 59% and *P*-value of 0.002 indicate heterogeneity of included studies.

<sup>b</sup> Confidence interval includes both appreciable benefit and harm.
