# Supplementary material for: Association between Dupilumab and Conjunctivitis: A Systematic Review and Meta-Analysis of Randomized Controlled Trials
Source: MDPI journal article supplement (doi:10.3390/pharmaceutics15041031), 2023-03-23
Supplement: s1 [file s1]

**Table S2** Search strategy of study

|                                                                                                                                                                                                     |
|-----------------------------------------------------------------------------------------------------------------------------------------------------------------------------------------------------|
| <b>PubMed</b>                                                                                                                                                                                       |
| ("dupilumab"[Supplementary Concept] OR "dupilumab"[All Fields] OR "dupixent"[All Fields] OR "sar231893"[All Fields] OR "sar 231893"[All Fields] OR "regn668"[All Fields] OR "regn 668"[All Fields]) |
| <b>Embase</b>                                                                                                                                                                                       |
| 'dupilumab'/exp OR dupilumab OR Dupixent OR sar231893 OR 'sar 231893' OR regn668 OR 'regn 668'                                                                                                      |
| <b>Cochrane library</b>                                                                                                                                                                             |
| dupilumab OR Dupixent OR SAR231893 OR SAR-231893 OR REGN668 OR REGN-668                                                                                                                             |
| <b>ClinicalTrial.gov</b>                                                                                                                                                                            |
| dupilumab OR Dupixent OR SAR231893 OR SAR-231893 OR REGN668 OR REGN-668                                                                                                                             |
